# Supplementary material for: Higher white matter hyperintensity lesion load is associated with reduced long-range functional connectivity
Source: PubMed Central journal article supplement — Brain Commun. 2020 Jul 20;2(2):fcaa111. doi: 10.1093/braincomms/fcaa111 (PMC7585696; doi:10.1093/braincomms/fcaa111), 2020-07-20
Supplement: fcaa111_supplementary_data.pdf [file fcaa111_supplementary_data.pdf]

## Supplementary Material

# Higher white matter hyperintensity lesion load is associated with reduced long-range functional connectivity

Quandt, Fanny <sup>1</sup>; Fischer, Felix <sup>1</sup>; Schröder, Julian <sup>1</sup>; Heinze, Marlene <sup>1</sup>; Lettow, Iris <sup>1</sup>; Frey, Benedikt M. <sup>1</sup>; Kessner, Simon S. <sup>1</sup>; Schulz, Maximilian <sup>1</sup>; Higgen, Focko L. <sup>1</sup>; Cheng, Bastian <sup>1</sup>; Gerloff, Christian <sup>1</sup>; Thomalla, Götz <sup>1</sup>

<sup>1</sup> Department of Neurology, University Medical Center Hamburg–Eppendorf

## 1 Supplementary Results

### Analysis of Oscillatory Power

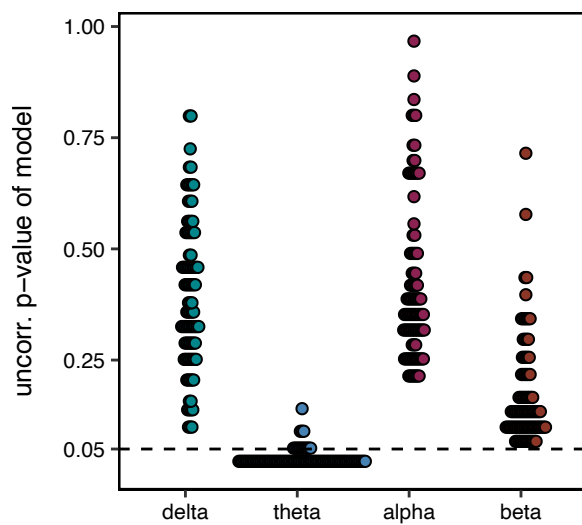

**Supplementary figure 1.** Uncorrected p-values of linear models with oscillatory power as a function of white matter lesion load and age.

## Hippocampus Volume

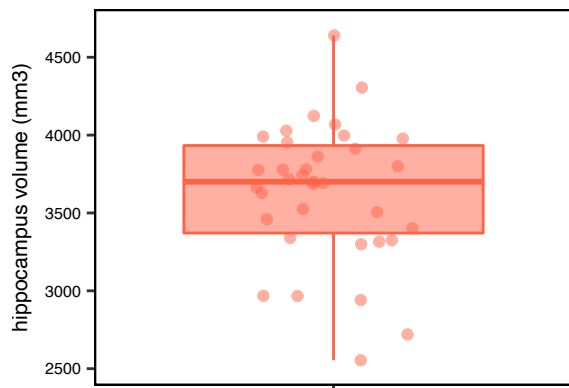

**Supplementary figure 2.** Mean hippocampus volume (left/right) in mm<sup>3</sup> of all participants. Boxplot depicts median and 25%/75% quantile; points show individual data.

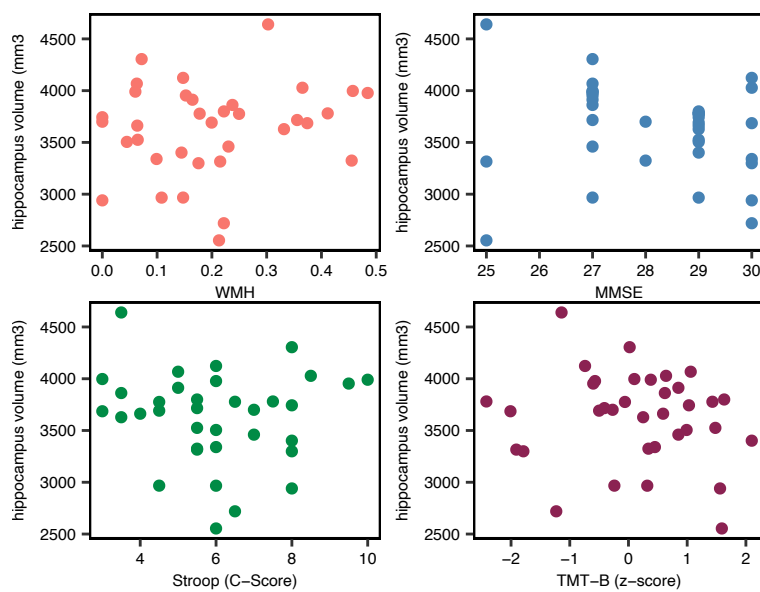

**Supplementary figure 3.** Scatter plot of WMH and cognitive function in relation to mean hippocampus volume (left/right) in mm<sup>3</sup> of all participants.
